# Supplementary material for: Antimicrobial Protein Candidates from the Thermophilic Geobacillus sp. Strain ZGt-1: Production, Proteomics, and Bioinformatics Analysis
Source: PubMed Central journal article supplement (PMC5000758; doi:10.3390/ijms17081363), 2016-08-19
Supplement: ijms-17-01363-s001.pdf [file ijms-17-01363-s001.pdf]

## Supplementary Materials: Antimicrobial Protein Candidates from the Thermophilic *Geobacillus* sp. Strain ZGt-1: Production, Proteomics, and Bioinformatics Analysis

Rawana N. Alkhalili, Katja Bernfur, Tarek Dishisha, Gashaw Mamo, Jenny Schelin, Björn Canbäck, Cecilia Emanuelsson and Rajni Hatti-Kaul

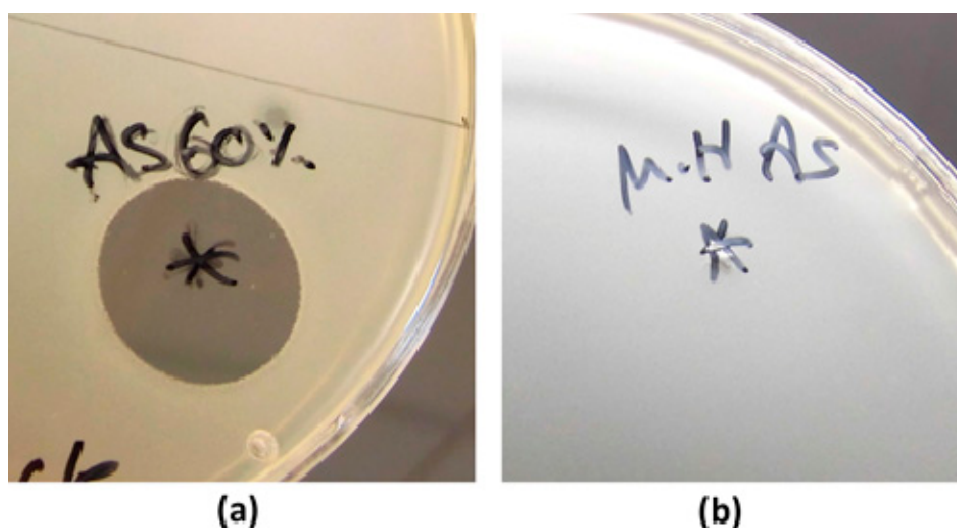

**Figure S1.** Antibacterial activity of the (a) concentrated and desalted protein fraction from the culture supernatant obtained after batch cultivation of immobilized *Geobacillus* sp. ZGt-1 cells; and (b) concentrated and desalted Mueller Hinton broth (negative control), tested by the spot-on-lawn method. Fifty microliters of the samples were spotted over a layer of soft Mueller Hinton agar seeded with *G. stearotherophilus* strain 10 in two separate Petri dishes. The antibacterial activity was observed only in the case of (a).

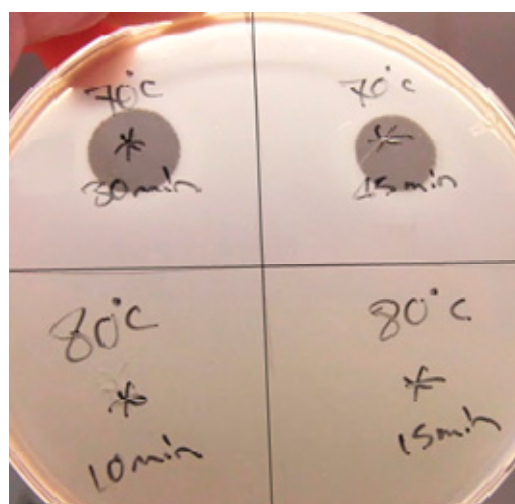

**Figure S2.** Antibacterial activity of the concentrated and desalted protein fraction after heating at 70 °C for 30 and 45 min, and at 80 °C for 10 and 15 min. Fifty microliters of the samples were spotted over a layer of soft Mueller Hinton agar seeded with *G. stearotherophilus* strain 10.

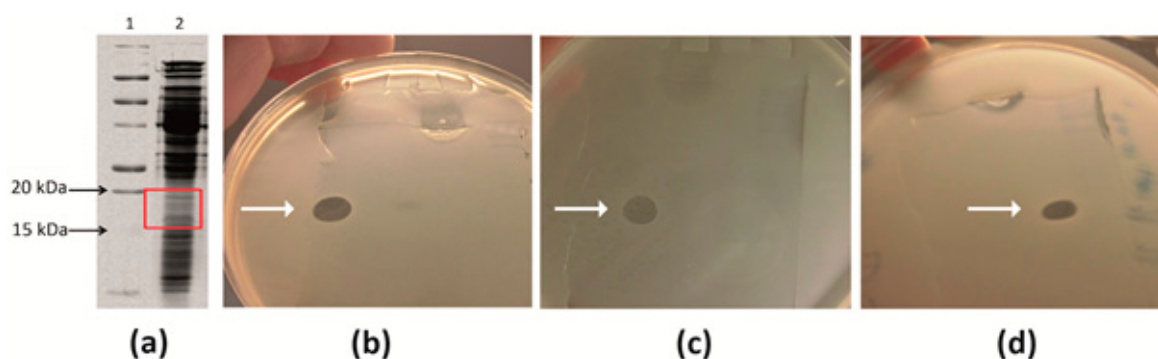

**Figure S3.** Analysis of the antibacterial activity of the desalted protein fraction isolated from the culture supernatant produced by *Geobacillus* sp. ZGt-1 at 60 °C. The test organism was *G. stearotherophilus* strain 10. (a) Gel image of the SDS-PAGE separated protein fraction. **Lane 1:** Precision Plus Protein All Blue standards; **Lane 2:** Desalted protein fraction; (b–d) Plates representing the results of three independent assays; in each assay, the treated gel strip was placed in a Petri dish and covered with soft agar layer seeded with strain 10 and incubated at 60 °C. White arrows point to the inhibition zones produced due to the antibacterial activity of the protein fraction. The inhibition zone corresponded to the 15–20 kDa range in all the replicates.

**Table S1.** BLASTn (2.3.1+) analysis results of the 16S rRNA gene sequence. <sup>1</sup>

| Isolate Designation                           | Best Matched Identity                                                                           | Matched Identity <sup>2</sup> (%) | Query Cover (%) | Identities         | Length of the Sequenced Fragment of the Gene |
|-----------------------------------------------|-------------------------------------------------------------------------------------------------|-----------------------------------|-----------------|--------------------|----------------------------------------------|
| Strain ZGt-1 (GenBank accession no. KT026965) | <i>Geobacillus kaustophilus</i> strain BGSC 90A1                                                | 100.0                             | 100             | 1454/1454 residues | 1454                                         |
|                                               | <i>Geobacillus thermoleovorans</i> , strain LEH-1                                               | 99.9                              |                 | 1453/1454 residues |                                              |
| Strain 10 (GenBank accession no. KU933578)    | <i>Geobacillus stearotherophilus</i> strains (R-35646; NBRC 12550; BGSC 9A20; DSM 22; IFO12550) | 99.6                              | 99              | 1405/1411 residues | 1415                                         |

<sup>1</sup> BLASTn analysis was last checked on 23 May 2016; <sup>2</sup> Matched identity (%) had an e-value of 0.0. BLASTn analysis of 16S rRNA gene of strain ZGt-1 indicated that the strain belongs to the genus *Geobacillus*. At the time of writing this paper, a matched identity of 99.9%–100% to the 16S rRNA genes of *G. kaustophilus* and *G. thermoleovorans* strains was found (Table S1). BLASTn analysis of 16S rRNA gene of strain 10 indicated that the strain is best aligned with *G. stearotherophilus* (Table S1).

**Table S2.** Proteins identified by mass spectrometry of the SDS polyacrylamide gel, corresponding to 15–20 kDa region, which showed the inhibition zone against *G. stearothermophilus* strain 10.

| Query ID      | MS Score   | Mw (kDa)      | Homologous Protein Name                                                                   | UniProt ID    | Taxon ID <sup>a</sup> | Gel Sample <sup>a,b</sup> |
|---------------|------------|---------------|-------------------------------------------------------------------------------------------|---------------|-----------------------|---------------------------|
| 23_788        | 506        | 30.298        | 1,4-Dihydroxy-2-naphthoyl-CoA synthase                                                    | Q5KVX8        | 2                     | 1,3                       |
| 2_80          | 253        | 17.118        | 2-C-methyl-D-erythritol 2,4-cyclodiphosphate synthase                                     | G8N0X9        | 4                     | 2                         |
| 13_266        | 248        | 31.174        | 4-Hydroxy-tetrahydrodipicolinate synthase                                                 | G8N1Y8        | 4                     | 1,2,3                     |
| 26_51         | 615        | 85.418        | 5'-Nucleotidase domain protein                                                            | G8MXU7        | 4                     | 1,2,3                     |
| 23_188        | 469        | 16.072        | 6,7-Dimethyl-8-ribityllumazine synthase                                                   | L8A0J9        | 8                     | 1,2                       |
| 18_137        | 410        | 54.566        | 6-Phospho-beta-glucosidase                                                                | V6VF75        | 9                     | 1,2,3                     |
| 8_169         | 264        | 46.557        | ABC transporter substrate-binding protein                                                 | T0PXY1        | 5                     | 1                         |
| 23_721        | 217        | 65.139        | Acetyl-CoA synthetase                                                                     | Q5KW45        | 2                     | 1                         |
| 13_336        | 1440       | 99.980        | Aconitate hydratase                                                                       | G8N2L5        | 4                     | 1,2,3                     |
| 25_107        | 206        | 52.678        | Adenosylmethionine-8-amino-7-oxononanoate aminotransferase                                | T0NWM1        | 5                     | 2                         |
| 6_5           | 410        | 50.017        | Adenylosuccinate lyase                                                                    | Q5L3D6        | 2                     | 3                         |
| 26_67         | 430        | 51.713        | Aldehyde dehydrogenase                                                                    | A0A063YKS3    | 7                     | 1,2,3                     |
| 23_754        | 669        | 59.790        | Alkaline metalloprotease                                                                  | A0A0K0Q2H9    | 1                     | 1,2,3                     |
| 3_2           | 677        | 32.513        | Arginase                                                                                  | V6V9A1        | 9                     | 1                         |
| 28_41         | 488        | 20.475        | ATP synthase subunit b                                                                    | G8MZV8        | 4                     | 3                         |
| 6_13          | 493        | 55.023        | Bifunctional purine biosynthesis protein                                                  | G8N332        | 4                     | 1,2,3                     |
| 186_1_184_1   | 219        | 22.862        | Capsid protein                                                                            | A0A0K9I0I6    | 3                     | 2                         |
| 190_1_188_1   | 243        | 15.718        | Capsid protein                                                                            | A0A0K9I0I6    | 3                     | 1                         |
| 17_1          | 648        | 78.072        | Catalase-peroxidase                                                                       | Q9S5Q0        | 3                     | 1,2,3                     |
| 23_398        | 412        | 65.848        | Chaperone protein DnaK                                                                    | G8N2T3        | 4                     | 1,3                       |
| 171_3_169_3   | 491        | 33.261        | CRISPR-associated protein DevR                                                            | A0A0K9HTL1    | 3                     | 1,2,3                     |
| 13_50         | 363        | 35.476        | Dehydrogenase E1 component, beta subunit (Lipoamide)                                      | Q5L136        | 2                     | 1,2,3                     |
| 23_393        | 258        | 23.554        | Deoxyribose-phosphate aldolase                                                            | A0A063YQK6    | 6                     | 2                         |
| 13_52         | 971        | 49.544        | Dihydrolipoyl dehydrogenase                                                               | Q5L134        | 2                     | 1,2,3                     |
| 23_270        | 639        | 50.445        | Dihydrolipoyl dehydrogenase                                                               | Q5KXC2        | 2                     | 1,2,3                     |
| 13_51         | 281        | 47.152        | Dihydrolipoyllysine-residue acetyltransferase component of pyruvate dehydrogenase complex | G8MZH5        | 4                     | 1                         |
| 4_30          | 219        | 17.987        | DinB family protein                                                                       | U2WSJ5        | 2                     | 1                         |
| 2_100         | 371        | 77.174        | Elongation factor G                                                                       | A0A0D8BQU2    | 2                     | 2,3                       |
| 25_143        | 1080       | 46.573        | Enolase                                                                                   | G8MWZ8        | 4                     | 1,2,3                     |
| 8_126         | 295        | 36.350        | Ferrochelatase                                                                            | U2YAF2        | 2                     | 1,2,3                     |
| 26_1          | 403        | 19.041        | Flagellin                                                                                 | L8A2E4        | 8                     | 1,2,3                     |
| 28_66         | 247        | 31.073        | Fructose-bisphosphate aldolase                                                            | Q5KUG5        | 2                     | 1                         |
| 23_372        | 324        | 40.768        | GTP cyclohydrolase 1 type 2 homolog                                                       | Q5KX23        | 2                     | 1,3                       |
| <b>23_543</b> | <b>517</b> | <b>16.846</b> | <b>Hypothetical conserved protein</b>                                                     | <b>Q5KWM5</b> | <b>2</b>              | <b>1,3</b>                |
| 23_653        | 309        | 46.656        | Isocitrate dehydrogenase [NADP]                                                           | Q5KWB6        | 2                     | 1,2,3                     |
| 13_127        | 396        | 10.5192       | Isoleucine--tRNA ligase                                                                   | T0NQC8        | 5                     | 2,3                       |
| 23_272        | 828        | 40.739        | Leucine dehydrogenase                                                                     | G5EBC7        | 2                     | 1,2,3                     |
| 2_69          | 321        | 57.275        | Lysine--tRNA ligase                                                                       | T0PWW3        | 5                     | 2                         |
| 8_167         | 222        | 60.848        | Maltogenic amylase                                                                        | O69007        | 11                    | 2                         |
| 23_84         | 241        | 19.549        | Menaquinol-cytochrome c reductase iron-sulfur subunit                                     | S7U299        | 10                    | 2                         |
| <b>26_23</b>  | <b>223</b> | <b>89.226</b> | <b>N-acetylmuramoyl-L-alanine amidase</b>                                                 | <b>G8MXR3</b> | <b>4</b>              | <b>3</b>                  |
| 6_3           | 293        | 17044         | N <sup>5</sup> -carboxyaminoimidazole ribonucleotide                                      | Q5L3D8        | 2                     | 1,2                       |
| 23_103        | 610        | 16741         | Nucleoside diphosphate kinase                                                             | G8MZM9        | 4                     | 1                         |
| 12_77         | 385        | 66009         | Oligoendopeptidase, M3                                                                    | G8MYR3        | 4                     | 1,3                       |
| 4_16          | 559        | 44509         | Ornithine aminotransferase                                                                | Q5L3K7        | 2                     | 1,2,3                     |
| 13_48         | 231        | 20528         | Peptide deformylase                                                                       | Q5L138        | 2                     | 3                         |
| 23_492        | 803        | 21126         | Peroxiredoxin                                                                             | Q5KWS6        | 2                     | 3                         |
| 23_764        | 454        | 58571         | Phosphoenolpyruvate carboxykinase [ATP]                                                   | Q5KW01        | 2                     | 1,2,3                     |
| 8_32          | 266        | 65607         | Phosphomannomutase                                                                        | Q5L2H5        | 2                     | 2,3                       |
| 18_76         | 308        | 44778         | Precorrin-3B methylase CobJ fused to precorrin-6B methylase 2 CobL                        | G8N796        | 4                     | 1                         |
| 23_271        | 236        | 40290         | Probable butyrate kinase                                                                  | Q5KXC1        | 2                     | 1                         |
| 23_704        | 866        | 18266         | Probable thiol peroxidase                                                                 | Q5KW64        | 2                     | 3                         |
| 28_65         | 267        | 23049         | Probable transaldolase                                                                    | L8A4Q9        | 8                     | 3                         |
| <b>2_3</b>    | <b>223</b> | <b>51225</b>  | <b>Serine-type D-Ala-D-Ala carboxypeptidase</b>                                           | <b>Q5L3Y3</b> | <b>2</b>              | <b>1</b>                  |
| 23_775        | 357        | 16545         | Starvation-induced protein controlled by sigma-B                                          | Q5KVZ0        | 2                     | 1                         |
| 26_54         | 1898       | 192778        | surface layer glycoprotein SgsE                                                           | U2WRU3        | 2                     | 2,3                       |

Table S2. Cont.

| Query ID | MS Score | Mw (kDa) | Homologous Protein Name                                            | UniProt ID    | Taxon ID <sup>*a</sup> | Gel Sample <sup>*b</sup> |
|----------|----------|----------|--------------------------------------------------------------------|---------------|------------------------|--------------------------|
| 23_726   | 462      | 36590    | Transcriptional regulator involved in in carbon catabolite control | A0A098L0H0    | 4                      | 3                        |
| 13_321   | 486      | 72034    | Transketolase                                                      | T0Q680        | 5                      | 2,3                      |
| 25_145   | 314      | 27457    | Triosephosphate isomerase                                          | A0A063YNF6    | 7                      | 1                        |
| 4_4      | 432      | 19025    | <b>Uncharacterized protein</b>                                     | <b>Q5L3L9</b> | 2                      | 1,3                      |
| 6_35     | 406      | 13884    | <b>Uncharacterized protein</b>                                     | <b>Q5L3A8</b> | 2                      | 1,2                      |
| 93_1     | 1360     | 47857    | Uncharacterized protein                                            | T0PW66        | 5                      | 2,3                      |
| 18_68    | 208      | 27963    | Uroporphyrin-III C-methyltransferase                               | Q5KZ09        | 2                      | 1                        |
| 21_9     | 315      | 19432    | YceI family protein/uncharacterized protein                        | G8MXK2        | 4                      | 3                        |
| 23_747   | 234      | 51673    | Xaa-His dipeptidase                                                | A0A098KZ03    | 4                      | 2,3                      |
| 23_304   | 456      | 38937    | Xaa-Pro dipeptidase                                                | Q5KX90        | 2                      | 3                        |

\* Protein identification was obtained by matching the mass spectrometric data by Mascot searches either directly in UniProt, by sequence homology to proteins in other bacterial species, or in a two-step procedure matching the data first to the local database created based on the genome sequence of *Geobacillus* sp. strain ZGt-1 [27] followed by the identification by UniProt BLASTp-searches. UniProt BLASTp top hit proteins identified in other bacterial species with significant e-values ( $4.00 \times 10^{-157}$  to 0.0) are presented in columns **Homologous protein name** and **Taxon ID <sup>\*a</sup>** respectively; <sup>\*a</sup> The numbers in the **Taxon ID <sup>\*a</sup>** column correspond to the following organisms: 1: *B. subtilis*, 2: *G. kaustophilus*, 3: *G. stearothermophilus*, 4: *G. thermoleovorans*, 5: *Geobacillus* sp. A8, 6: *Geobacillus* sp. CAMR12739, 7: *Geobacillus* sp. CAMR5420, 8: *Geobacillus* sp. GHH01, 9: *Geobacillus* sp. MAS1, 10: *Geobacillus* sp. WSUCF1, 11: *Thermus* sp; <sup>\*b</sup> The gel area that showed the inhibition zone against *G. stearothermophilus* was excised and divided into three gel samples, 1, 2, and 3, with each sample analyzed separately. Proteins identified fulfill the following requirements: significant peptide  $\geq 5$ , protein score  $\geq 200$ , and peptide ion scores  $\geq 20$ .

**Table S3.** Amino acid sequences of detected peptides in the proteins identified as possible antimicrobials.

| Protein Query                            | Unique Peptides                     | Mw (Da) (expt.) <sup>2</sup> | Ion Charge | Ion Score |
|------------------------------------------|-------------------------------------|------------------------------|------------|-----------|
| <b>Uncharacterized protein (6_35)</b>    |                                     |                              |            |           |
| Gel sample 1 [406 (6)] <sup>1</sup>      | R.FQGDTELASANK.A                    | 1279.6015                    | +2         | 104       |
|                                          | R.FQGDTELASANKATNSK.S               | 1780.8523                    | +3         | 24        |
|                                          | K.SKVENSVVGADYK.A                   | 1394.7000                    | +2         | 88        |
|                                          | K.VENSVVGADYK.A                     | 1179.5742                    | +2         | 35        |
|                                          | K.VSPTALNVTNDNDR.Y                  | 1501.7295                    | +2         | 107       |
|                                          | K.VSPTALNVTNDNDRYFTVDQSAVGK.K       | 2697.3149                    | +3         | 110       |
| Gel sample 2 [352 (7)] <sup>1</sup>      | R.FQGDTELASANK.A                    | 1279.6013                    | +2         | 102       |
|                                          | R.FQGDTELASANKATNSK.S               | 1780.8536                    | +3         | 50        |
|                                          | K.SKVENSVVGADYK.A                   | 1394.7005                    | +2         | 67        |
|                                          | K.VSPTALNVTNDNDR.Y                  | 1501.7287                    | +2         | 99        |
|                                          | K.VSPTALNVTNDNDRYFTVDQSAVGK.K       | 2697.3143                    | +3         | 55        |
|                                          | R.YFTVDQSAVGK.K                     | 1213.5948                    | +2         | 29        |
|                                          | R.YFTVDQSAVGKK.V                    | 1341.6898                    | +3         | 22        |
| <b>Hypothetical protein (23_543)</b>     |                                     |                              |            |           |
| Gel sample 1 [292 (6)] <sup>1</sup>      | R.LAIAADNNTK.T                      | 1029.5427                    | +2         | 59        |
|                                          | R.LAIAADNNTK.T                      | 1029.5427                    | +2         | 43        |
|                                          | R.LAIAADNNTKTSYTLK.Q                | 1722.9063                    | +3         | 34        |
|                                          | K.QLYDDGYLENIPK.S                   | 1566.7493                    | +2         | 88        |
|                                          | K.VTLVDDDGEFVYIDGSK.D               | 1870.8750                    | +2         | 86        |
|                                          | K.VTLVDDDGEFVYIDGSKDVNELTR.K        | 2698.2871                    | +3         | 48        |
| Gel sample 3 [517 (9)] <sup>1</sup>      | R.LAIAADNNTK.T                      | 1029.5426                    | +2         | 74        |
|                                          | R.LAIAADNNTK.T                      | 1029.5427                    | +2         | 53        |
|                                          | K.QLYDDGYLENIPK.S                   | 1566.7516                    | +2         | 79        |
|                                          | K.QLYDDGYLENIPKSPGK.H               | 1935.9538                    | +3         | 65        |
|                                          | K.ETDEKNNVTGILYK.V                  | 1622.8100                    | +2         | 87        |
|                                          | K.ETDEKNNVTGILYK.V                  | 1622.8102                    | +3         | 20        |
|                                          | K.NNVTGILYK.V                       | 1020.5575                    | +2         | 60        |
|                                          | K.VTLVDDDGEFVYIDGSK.D               | 1870.8775                    | +2         | 115       |
| K.VTLVDDDGEFVYIDGSKDVNELTR.K             | 2698.2894                           | +3                           | 67         |           |
| <b>Uncharacterized protein (4_4)</b>     |                                     |                              |            |           |
| Gel sample 1 [432 (7)] <sup>1</sup>      | K.TIGDLVVLGNSNLPK.G                 | 1625.8924                    | +3         | 40        |
|                                          | K.TIGDLVVLGNSNLPK.G                 | 1625.8942                    | +2         | 91        |
|                                          | K.GAVVQIVMK.E                       | 943.5480                     | +2         | 48        |
|                                          | K.QVLEEKVNVGEDGSYSWSAK.R            | 2224.0552                    | +3         | 97        |
|                                          | K.VNVGEDGSYSWSAK.R                  | 1497.6652                    | +2         | 78        |
|                                          | K.DSSGRVEYQTDGQTYVGIK.M             | 2101.9830                    | +3         | 59        |
|                                          | R.VEYQTDGQTYVGIK.M                  | 1599.7712                    | +2         | 97        |
|                                          | Gel sample 3 [390 (7)] <sup>1</sup> | K.TIGDLVVLGNSNLPK.G          | 1625.8932  | +3        |
| K.TIGDLVVLGNSNLPK.G                      |                                     | 1625.8941                    | +2         | 69        |
| K.GAVVQIVMK.E                            |                                     | 943.5497                     | +2         | 66        |
| K.QVLEEKVNVGEDGSYSWSAK.R                 |                                     | 2224.0564                    | +3         | 49        |
| K.VNVGEDGSYSWSAK.R                       |                                     | 1497.6660                    | +2         | 96        |
| K.DSSGRVEYQTDGQTYVGIK.M                  |                                     | 2101.9856                    | +3         | 52        |
| R.VEYQTDGQTYVGIK.M                       |                                     | 1599.7731                    | +2         | 77        |
| <b>Amidase (protein 26_23)</b>           |                                     |                              |            |           |
| Gel sample 3 [223 (6)] <sup>1</sup>      | R.VSYLLPGNRL                        | 1104.5902                    | +2         | 44        |
|                                          | R.HYSDRLALK.I                       | 1101.5917                    | +3         | 38        |
|                                          | K.ILETGLK.G                         | 772.4680                     | +2         | 21        |
|                                          | K.IIIDAGHGAHDTGAIGPGGTR.E           | 1985.0004                    | +3         | 83        |
|                                          | K.IIIDAGHGAHDTGAIGPGGTR.E           | 1985.0032                    | +4         | 35        |
|                                          | R.STDIFLELSER.T                     | 1308.6529                    | +2         | 61        |
| <b>DD-Carboxypeptidase (protein 2_3)</b> |                                     |                              |            |           |
| Gel sample 1 [223 (5)] <sup>1</sup>      | R.ADAAILVDAQTGR.I                   | 1299.6732                    | +2         | 80        |
|                                          | K.NIDTVLGIASMTK.M                   | 1361.7171                    | +2         | 53        |
|                                          | R.ALSNVPLRK.D                       | 996.6055                     | +2         | 46        |
|                                          | K.FVNATGLSNK.D                      | 1049.5472                    | +2         | 60        |
|                                          | R.VPLVTTTEVEK.A                     | 1214.6722                    | +2         | 34        |

<sup>1</sup> Significant protein score (number of significant peptides) in the respective gel sample; <sup>2</sup> Mw (expt.): Theoretical molecular weight expected from the amino acids sequence.
